# Supplementary material for: Formation of sandwich, macrocyclic and box supramolecular assemblies that were controlled by the distance of two oxygen atoms in hydrogen bonding donors
Source: Royal Society of Chemistry journal article supplement (doi:10.1039/d1ce00644d), 2021-01-01
Supplement: d1ce00644d1.pdf [file d1ce00644d1.pdf]

## Electronic Supplementary Information

### Formation of Sandwiches, Macrocycles and Boxes supramolecular assemblies that were controlled by the distance of two oxygen atoms in hydrogen bonding donors

Fei Zeng\*, Lin-Li Tang, Juan Liao, Man-Hua Ding\* and Guang-Chuan Ou

Department of Biology and Chemistry, Hunan University of Science and Engineering,  
Yongzhou 425199, China.

*E-mail: zengfei@iccas.ac.cn*

### Contents

|                                                                                               |   |
|-----------------------------------------------------------------------------------------------|---|
| 1. X-Ray crystal structure analyses .....                                                     | 2 |
| 2. Synthesis of 1 <sub>2</sub> •2, 1•3 and 1 <sub>2</sub> •4 <sub>2</sub> .....               | 2 |
| 3. Crystal structures data of 1 <sub>2</sub> •2, 1•3 and 1 <sub>2</sub> •4 <sub>2</sub> ..... | 2 |

### 1. X-Ray crystal structure analyses

The X-ray intensity data for **1<sub>2</sub>•2**, **1•3** and **1<sub>2</sub>•4<sub>2</sub>** were collected on a standard Bruker SMART-1000 CCD Area Detector System equipped with a normal-focus molybdenum-target X-ray tube ( $\lambda = 0.71073 \text{ \AA}$ ) operated at 2.0 kW (50 kV, 40 mA) and a graphite monochromator. The structures were solved by using direct methods and were refined by employing full-matrix leastsquares cycles on  $F^2$  (Bruker, SHELXTL-97)..

### 2. Synthesis of **1<sub>2</sub>•2**, **1•3** and **1<sub>2</sub>•4<sub>2</sub>**

To a solution of 1,8-Bis(4-pyridylethynyl)anthracene (3.8 mg, 0.1 mmol) in CH<sub>2</sub>Cl<sub>2</sub> (3 mL) was slowly added a CH<sub>2</sub>Cl<sub>2</sub> solution (1 mL) of hydroquinone **2**, resorcinol **3** and 1,5-dihydroxynaphthalene **4** respectively with stirring at room temperature, and yellow crystals of **1<sub>2</sub>•2**, **1•3** and **1<sub>2</sub>•4<sub>2</sub>** were then obtained by slow evaporation of the above mixture solution in 5 to 8 days.

### 3. Crystal structures data of **1<sub>2</sub>•2**, **1•3** and **1<sub>2</sub>•4<sub>2</sub>**

| 1 <sub>2</sub> •2             |             |
|-------------------------------|-------------|
| _space_group_crystal_system   | 'triclinic' |
| _space_group_IT_number        | 2           |
| _space_group_name_H-M_alt     | 'P -1'      |
| _space_group_name_Hall        | '-P 1'      |
| _cell_length_a                | 8.459(4)    |
| _cell_length_b                | 10.258(5)   |
| _cell_length_c                | 13.519(7)   |
| _cell_angle_alpha             | 107.813(5)  |
| _cell_angle_beta              | 96.028(6)   |
| _cell_angle_gamma             | 91.195(6)   |
| _cell_volume                  | 1108.9(10)  |
| _cell_formula_units_Z         | 2           |
| _cell_measurement_reflns_used | 3279        |
| _cell_measurement_temperature | 296.15      |

| 1●3                           |            |
|-------------------------------|------------|
| _space_group_crystal_system   | monoclinic |
| _space_group_IT_number        | 14         |
| _space_group_name_H-M_alt     | 'P 21/c'   |
| _space_group_name_Hall        | '-P 2ybc'  |
| _cell_length_a                | 5.6736(15) |
| _cell_length_b                | 25.031(6)  |
| _cell_length_c                | 18.519(5)  |
| _cell_angle_alpha             | 90         |
| _cell_angle_beta              | 105.220(7) |
| _cell_angle_gamma             | 90         |
| _cell_volume                  | 2537.7(11) |
| _cell_formula_units_Z         | 4          |
| _cell_measurement_temperature | 298(2)     |

| $I_2 \bullet 4_2$               |           |
|---------------------------------|-----------|
| _space_group_crystal_system     | triclinic |
| _space_group_IT_number          | 2         |
| _space_group_name_H-M_alt       | 'P -1'    |
| _space_group_name_Hall          | '-P 1'    |
| _space_group_symop_operation_xy | z         |
| cell_length_a                   | 9.934(4)  |
| cell_length_b                   | 11.169(4) |
| cell_length_c                   | 14.409(5) |
| cell_angle_alpha                | 81.527(4) |
| cell_angle_beta                 | 72.017(4) |
| cell_angle_gamma                | 66.137(4) |
| cell_volume                     | 1390.3(9) |
| cell_formula_units_Z            | 2         |
| cell_measurement_temperature    | 296(2)    |
